# Supplementary material for: Triazole-directed fabrication of polyoxovanadate-based metal–organic frameworks as efficient multifunctional heterogeneous catalysts for the Knoevenagel condensation and oxidation of alcohols
Source: Royal Society of Chemistry journal article supplement (doi:10.1039/d1dt01413g), 2021-01-01
Supplement: d1dt01413g1.pdf [file d1dt01413g1.pdf]

Supporting Information for

# Triazole-directed Fabrication of Polyoxovanadate-based Metal-organic Frameworks as Efficient Multifunctional Heterogeneous Catalysts for Knoevenagel Condensation and Oxidation of Alcohols

Jikun Li, Chuanping Wei, Yinfeng Han, Yu Mei, Xueli Cheng, Xianqiang Huang, and Changwen Hu

## Table of contents

**Table S1.** Bond valance sum calculations for PMOFs 1-3.

**Table S2.** Selected Bond lengths [ $\text{\AA}$ ] and angles [ $^\circ$ ] for PMOFs 1-3.

**Table S3.** Comparison of Knoevenagel condensation with different POM-based catalysts.

**Figure S1.** The 2D inorganic-organic hybrid network of PMOF 2.

**Figure S2.** The 3D supramolecular structure of PMOF 2.

**Figure S3.** The FT-IR spectra of PMOF 1.

**Figure S4.** The FT-IR spectra of PMOF 2.

**Figure S5.** The FT-IR spectra of PMOF 3.

**Figure S6.** The FT-IR spectra of the reused PMOF 1.

**Figure S7.** The simulated, experimental and recycled PXRD patterns of PMOF 1. Simulation based on the SXRD data.

**Figure S8.** The simulated (black) and experimental (red) PXRD patterns of PMOF 2. Simulation based on the SXRD data.

**Figure S9.** The simulated (black) and experimental (red) PXRD patterns of PMOF 3. Simulation based on the SXRD data.

**Figure S10.** The TG analysis curves of PMOFs 1-3.

**Figure S11.** The  $^1\text{H}$  and  $^{13}\text{C}$  NMR spectra of the compounds isolated from Knoevenagel condensation.

**Table S1.** Bond valance sum calculations for PMOFs 1-3.<sup>[a][1-3]</sup>

| 1                          | V site                      | V1   | V2   | V3   | V4   | V5   |
|----------------------------|-----------------------------|------|------|------|------|------|
|                            | <b>BVS (V<sup>IV</sup>)</b> | 5.01 | 5.14 | 5.00 | -    | -    |
| <b>BVS (V<sup>V</sup>)</b> | 5.27                        | 5.41 | 5.26 | -    | -    |      |
| <b>assigned O.S.</b>       | 5                           | 5    | 5    | -    | -    |      |
| 2                          | V site                      | V1   | V2   | V3   | V4   | V5   |
|                            | <b>BVS (V<sup>IV</sup>)</b> | 4.96 | 4.99 | 5.00 | -    | -    |
| <b>BVS (V<sup>V</sup>)</b> | 5.22                        | 5.25 | 5.26 | -    | -    |      |
| <b>assigned O.S.</b>       | 5                           | 5    | 5    | -    | -    |      |
| 3                          | V site                      | V1   | V2   | V3   | V4   | V5   |
|                            | <b>BVS (V<sup>IV</sup>)</b> | 5.52 | 5.52 | 5.50 | 5.48 | 5.49 |
| <b>BVS (V<sup>V</sup>)</b> | 5.81                        | 5.82 | 5.79 | 5.77 | 5.78 |      |
| <b>assigned O.S.</b>       | 5                           | 5    | 5    | 5    | 5    |      |

[a] The calculations were performed twice for each individual vanadium atom using bond-valence parameters presented by Brese and O’Keeffe. The oxidation state of atom *i* is given by  $\sum v_{ij}=V$  with  $v_{ij}=\exp[(R_{ij}-d_{ij})/b]$ . Here *b* is taken to be a ‘universal’ constant equal to 0.37 Å,  $v_{ij}$  is the valence of a bond between two atoms *i* and *j*,  $R_{ij}$  is the empirical parameter, and  $d_{ij}$  is the observed bond length.

**Table S2.** Selected Bond lengths [Å] and angles [°] for PMOFs 1-3.

| PMOF 1                                                                                                                                               |            |                   |            |
|------------------------------------------------------------------------------------------------------------------------------------------------------|------------|-------------------|------------|
| Ni(1)-O(4)                                                                                                                                           | 2.031(2)   | Ni(1)-O(1)        | 2.055(2)   |
| Ni(1)-N(9)                                                                                                                                           | 2.058(2)   | Ni(1)-N(2)        | 2.063(3)   |
| Ni(1)-N(6)                                                                                                                                           | 2.059(3)   | Ni(1)-O(9)#3      | 2.062(2)   |
| Ni(2)-N(5)                                                                                                                                           | 2.103(2)   | Ni(2)-N(1)        | 2.110(2)   |
| Ni(2)-N(10)                                                                                                                                          | 2.113(3)   | V(1)-O(2)         | 1.617(3)   |
| V(1)-O(1)                                                                                                                                            | 1.656(2)   | V(1)-O(6)#1       | 1.777(3)   |
| V(1)-O(3)                                                                                                                                            | 1.785(2)   | V(2)-O(5)         | 1.611(3)   |
| V(2)-O(4)                                                                                                                                            | 1.631(2)   | V(2)-O(6)         | 1.774(3)   |
| V(2)-O(7)                                                                                                                                            | 1.787(2)   | V(3)-O(8)         | 1.625(3)   |
| V(3)-O(9)                                                                                                                                            | 1.644(2)   | V(3)-O(3)#2       | 1.785(2)   |
| V(3)-O(7)                                                                                                                                            | 1.795(2)   | N(1)-N(2)         | 1.373(4)   |
| O(2)-V(1)-O(1)                                                                                                                                       | 109.79(12) | O(2)-V(1)-O(6)#1  | 110.64(16) |
| O(1)-V(1)-O(6)#1                                                                                                                                     | 107.17(12) | O(2)-V(1)-O(3)    | 107.71(13) |
| O(1)-V(1)-O(3)                                                                                                                                       | 110.68(11) | O(6)#1-V(1)-O(3)  | 110.86(15) |
| O(5)-V(2)-O(4)                                                                                                                                       | 107.45(15) | O(5)-V(2)-O(6)    | 109.09(18) |
| O(4)-V(2)-O(6)                                                                                                                                       | 108.22(14) | O(5)-V(2)-O(7)    | 110.41(15) |
| O(4)-V(2)-O(7)                                                                                                                                       | 110.01(12) | O(6)-V(2)-O(7)    | 111.55(13) |
| O(8)-V(3)-O(9)                                                                                                                                       | 109.30(14) | O(8)-V(3)-O(3)#2  | 108.51(15) |
| O(9)-V(3)-O(3)#2                                                                                                                                     | 109.00(13) | O(8)-V(3)-O(7)    | 109.38(13) |
| O(9)-V(3)-O(7)                                                                                                                                       | 109.76(12) | O(3)#2-V(3)-O(7)  | 110.87(12) |
| O(4)-Ni(1)-O(1)                                                                                                                                      | 89.63(10)  | O(4)-Ni(1)-N(9)   | 93.64(10)  |
| O(1)-Ni(1)-N(9)                                                                                                                                      | 89.79(9)   | O(4)-Ni(1)-N(2)   | 93.21(10)  |
| O(1)-Ni(1)-N(2)                                                                                                                                      | 175.31(9)  | N(9)-Ni(1)-N(2)   | 86.31(10)  |
| O(4)-Ni(1)-N(6)                                                                                                                                      | 171.61(10) | O(1)-Ni(1)-N(6)   | 87.79(9)   |
| N(9)-Ni(1)-N(6)                                                                                                                                      | 94.33(10)  | O(1)-Ni(1)-O(9)#3 | 90.87(9)   |
| O(4)-Ni(1)-O(9)#3                                                                                                                                    | 84.50(10)  | N(2)-Ni(1)-O(9)#3 | 93.11(10)  |
| N(9)-Ni(1)-O(9)#3                                                                                                                                    | 178.02(10) | N(5)-Ni(2)-N(1)   | 90.33(10)  |
| N(6)-Ni(1)-O(9)#3                                                                                                                                    | 87.56(10)  | N(5)#4-Ni(2)-N(1) | 89.67(10)  |
| N(1)#4-Ni(2)-N(10)                                                                                                                                   | 90.96(10)  | N(5)-Ni(2)-N(10)  | 90.71(10)  |
| V(3)#5-O(3)-V(1)                                                                                                                                     | 145.38(15) | N(1)-Ni(2)-N(10)  | 89.04(10)  |
| Symmetry transformations used to generate equivalent atoms: #1 -x+2, -y, -z+1; #2 x+1, y+1, z; #3 -x+2, -y+1, -z+1; #4 -x+1, -y, -z; #5 x-1, y-1, z. |            |                   |            |
| PMOF 2                                                                                                                                               |            |                   |            |
| V(1)-O(2)                                                                                                                                            | 1.627(2)   | V(1)-O(1)         | 1.648(2)   |
| V(1)-O(7)#1                                                                                                                                          | 1.792(2)   | V(1)-O(4)         | 1.794(2)   |
| V(2)-O(5)                                                                                                                                            | 1.619(3)   | V(2)-O(3)         | 1.6612(19) |
| V(2)-O(9)#2                                                                                                                                          | 1.776(3)   | V(2)-O(4)#3       | 1.779(2)   |
| V(3)-O(8)                                                                                                                                            | 1.618(3)   | V(3)-O(6)         | 1.645(2)   |
| V(3)-O(9)                                                                                                                                            | 1.769(2)   | V(3)-O(7)         | 1.795(2)   |
| Co(1)-N(2)                                                                                                                                           | 2.145(3)   | Co(1)-N(2)#4      | 2.145(3)   |
| Co(1)-N(6)#4                                                                                                                                         | 2.153(2)   | Co(1)-N(10)#4     | 2.160(2)   |
| Co(2)-O(6)                                                                                                                                           | 2.058(2)   | Co(2)-O(3)        | 2.064(2)   |
| Co(2)-O(1)                                                                                                                                           | 2.076(2)   | Co(2)-N(1)        | 2.118(2)   |
| Co(2)-N(9)                                                                                                                                           | 2.119(2)   | Co(2)-N(5)        | 2.122(3)   |

|                  |            |                    |            |
|------------------|------------|--------------------|------------|
| O(2)-V(1)-O(1)   | 109.02(13) | O(2)-V(1)-O(7)#1   | 109.71(13) |
| O(1)-V(1)-O(7)#1 | 109.86(12) | O(2)-V(1)-O(4)     | 107.91(15) |
| O(1)-V(1)-O(4)   | 109.48(12) | O(7)#1-V(1)-O(4)   | 110.82(11) |
| O(5)-V(2)-O(3)   | 109.70(13) | O(5)-V(2)-O(9)#2   | 111.45(16) |
| O(3)-V(2)-O(9)#2 | 106.76(11) | O(5)-V(2)-O(4)#3   | 107.53(13) |
| O(3)-V(2)-O(4)#3 | 110.77(11) | O(9)#2-V(2)-O(4)#3 | 110.66(15) |
| O(8)-V(3)-O(6)   | 107.55(15) | O(8)-V(3)-O(7)     | 110.78(16) |
| O(9)-V(3)-O(7)   | 111.62(12) | N(2)-Co(1)-N(2)#4  | 180.0      |
| N(2)-Co(1)-N(6)  | 90.17(10)  | N(2)-Co(1)-N(6)#4  | 89.83(10)  |
| N(2)-Co(1)-N(10) | 90.60(10)  | N(2)-Co(1)-N(10)#4 | 89.40(10)  |
| O(6)-Co(2)-O(3)  | 90.54(9)   | O(3)-Co(2)-O(1)    | 91.77(9)   |
| O(3)-Co(2)-N(5)  | 173.28(9)  | N(1)-Co(2)-N(5)    | 89.11(10)  |

Symmetry transformations used to generate equivalent atoms: #1 -x+1, -y+1, -z+2; #2 -x+1, -y, -z+2; #3 -x, -y, -z+2; #4 -x, -y, -z+1.

#### PMOF 3

|                     |           |                     |           |
|---------------------|-----------|---------------------|-----------|
| Cu(1)-O(2)          | 1.908(8)  | Cu(1)-N(10)         | 1.928(10) |
| Cu(1)-N(1)          | 1.950(9)  | Cu(1)-O(16)         | 1.953(7)  |
| Cu(1)-O(6)#1        | 2.189(9)  | Cu(2)-N(2)          | 1.934(10) |
| Cu(2)-O(14)#2       | 1.889(8)  | Cu(2)-N(5)          | 1.943(10) |
| Cu(2)-O(16)         | 1.974(7)  | Cu(2)-O(17)         | 2.324(9)  |
| Cu(3)-O(9)          | 1.842(8)  | Cu(3)-N(9)          | 1.899(10) |
| Cu(3)-N(6)          | 1.917(10) | Cu(3)-O(16)         | 1.943(8)  |
| Cu(3)-O(10)#3       | 2.422(9)  | V(1)-O(3)           | 1.569(9)  |
| V(1)-O(2)           | 1.637(8)  | V(1)-O(1)           | 1.726(9)  |
| V(1)-O(4)           | 1.759(9)  | V(2)-O(6)           | 1.587(8)  |
| V(2)-O(5)           | 1.605(8)  | V(2)-O(7)           | 1.738(8)  |
| V(2)-O(1)           | 1.766(9)  | V(3)-O(10)          | 1.568(9)  |
| V(3)-O(9)           | 1.635(7)  | V(3)-O(7)#4         | 1.723(9)  |
| V(3)-O(8)           | 1.772(8)  | V(4)-O(12)          | 1.594(9)  |
| V(4)-O(13)          | 1.601(8)  | V(4)-O(8)           | 1.749(8)  |
| V(4)-O(11)          | 1.756(8)  | V(5)-O(15)          | 1.575(9)  |
| V(5)-O(14)          | 1.648(8)  | V(5)-O(4)#1         | 1.716(8)  |
| V(5)-O(11)          | 1.750(8)  | N(1)-N(2)           | 1.341(13) |
| O(2)-Cu(1)-N(10)    | 90.5(4)   | O(2)-Cu(1)-N(1)     | 91.5(4)   |
| N(10)-Cu(1)-N(1)    | 171.2(4)  | O(2)-Cu(1)-O(16)    | 165.5(3)  |
| N(10)-Cu(1)-O(16)   | 89.4(4)   | N(1)-Cu(1)-O(16)    | 86.6(4)   |
| O(2)-Cu(1)-O(6)#1   | 93.4(3)   | N(10)-Cu(1)-O(6)#1  | 96.1(4)   |
| N(1)-Cu(1)-O(6)#1   | 92.3(4)   | O(16)-Cu(1)-O(6)#1  | 101.0(3)  |
| O(14)#2-Cu(2)-N(2)  | 89.6(4)   | O(14)#2-Cu(2)-N(5)  | 92.1(4)   |
| N(2)-Cu(2)-N(5)     | 173.6(4)  | O(14)#2-Cu(2)-O(16) | 170.7(4)  |
| N(2)-Cu(2)-O(16)    | 87.8(3)   | N(5)-Cu(2)-O(16)    | 89.5(3)   |
| O(14)#2-Cu(2)-O(17) | 98.4(4)   | N(2)-Cu(2)-O(17)    | 99.0(4)   |
| N(5)-Cu(2)-O(17)    | 86.9(4)   | O(16)-Cu(2)-O(17)   | 90.8(3)   |
| O(9)-Cu(3)-N(9)     | 91.1(4)   | O(9)-Cu(3)-N(6)     | 91.7(4)   |
| N(9)-Cu(3)-N(6)     | 167.1(4)  | O(9)-Cu(3)-O(16)    | 171.5(3)  |
| N(9)-Cu(3)-O(16)    | 89.3(4)   | N(6)-Cu(3)-O(16)    | 89.8(3)   |
| O(9)-Cu(3)-O(10)#3  | 94.4(3)   | N(9)-Cu(3)-O(10)#3  | 95.0(4)   |
| N(6)-Cu(3)-O(10)#3  | 97.4(4)   | O(16)-Cu(3)-O(10)#3 | 77.1(3)   |
| O(3)-V(1)-O(2)      | 107.9(5)  | O(3)-V(1)-O(1)      | 109.3(5)  |
| O(2)-V(1)-O(1)      | 110.2(4)  | O(3)-V(1)-O(4)      | 108.9(5)  |
| O(2)-V(1)-O(4)      | 106.7(4)  | O(1)-V(1)-O(4)      | 113.7(5)  |
| O(6)-V(2)-O(5)      | 109.5(4)  | O(6)-V(2)-O(7)      | 110.3(4)  |
| O(5)-V(2)-O(7)      | 109.0(4)  | O(6)-V(2)-O(1)      | 108.6(4)  |
| O(5)-V(2)-O(1)      | 110.0(5)  | O(7)-V(2)-O(1)      | 109.3(4)  |
| O(10)-V(3)-O(9)     | 111.5(5)  | O(10)-V(3)-O(7)#4   | 110.1(5)  |
| O(9)-V(3)-O(7)#4    | 109.4(4)  | O(10)-V(3)-O(8)     | 109.4(4)  |
| O(9)-V(3)-O(8)      | 106.6(4)  | O(7)#4-V(3)-O(8)    | 109.9(4)  |
| O(12)-V(4)-O(13)    | 108.4(5)  | O(12)-V(4)-O(8)     | 106.4(5)  |
| O(13)-V(4)-O(8)     | 111.7(4)  | O(12)-V(4)-O(11)    | 107.1(5)  |
| O(13)-V(4)-O(11)    | 111.4(5)  | O(8)-V(4)-O(11)     | 111.6(4)  |
| O(15)-V(5)-O(14)    | 109.4(5)  | O(15)-V(5)-O(4)#1   | 107.6(5)  |
| O(14)-V(5)-O(4)#1   | 112.0(5)  | O(15)-V(5)-O(11)    | 111.2(5)  |
| O(14)-V(5)-O(11)    | 107.9(4)  | O(4)#1-V(5)-O(11)   | 108.8(4)  |

Symmetry transformations used to generate equivalent atoms: #1 -x+1, -y+1, -z+1 ; #2 x, y, z-1; #3 -x+1, -y, -z+1; #4 x,y-1,z.

**Table S3.** Comparison of Knoevenagel condensation with different POM-based catalysts.

| Entry | Catalysts                                                                | Solvent              | T/°C   | Yield.(%) <sup>b</sup> | Ref       |
|-------|--------------------------------------------------------------------------|----------------------|--------|------------------------|-----------|
| 1     | Na-A-PW <sub>9</sub>                                                     | MeOH                 | rt     | 92                     | 14        |
| 2     | Fe <sub>3</sub> O <sub>4</sub> @SiO <sub>2</sub> @NH-NH <sub>2</sub> -PW | H <sub>2</sub> O     | reflux | 93                     | 36        |
| 3     | GO@ Fe <sub>3</sub> O <sub>4</sub> @POM                                  | PEG/H <sub>2</sub> O | rt     | 96                     | 37        |
| 4     | P <sub>2</sub> W <sub>18</sub> O <sub>68</sub>                           | H <sub>2</sub> O     | rt     | 90                     | 38        |
| 5     | [H <sub>4</sub> Ta <sub>6</sub> O <sub>19</sub> ] <sup>4-</sup>          | EtOH                 | 70     | 83                     | 39        |
| 6     | K <sub>7</sub> HNb <sub>6</sub> O <sub>19</sub>                          | EtOH                 | rt     | 99                     | 40        |
| 7     | [Zn(bix)]{V <sub>2</sub> O <sub>6</sub> }                                | -                    | 60     | >99                    | 22        |
| 8     | PMOF 1                                                                   | -                    | 45     | >99                    | this work |

**Figure S1.** The 2D inorganic-organic hybrid network of PMOF 2.

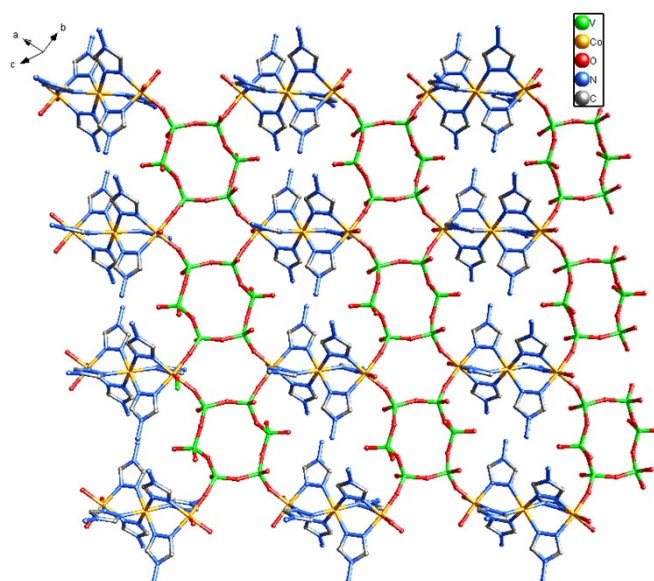

**Figure S2.** The 3D supramolecular structure of PMOF 2.

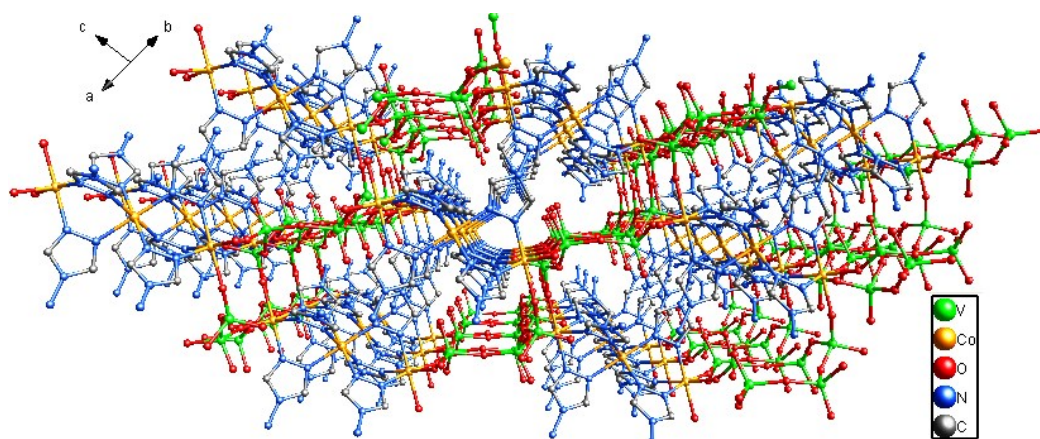

**Figure S3.** The FT-IR spectra of PMOF 1.

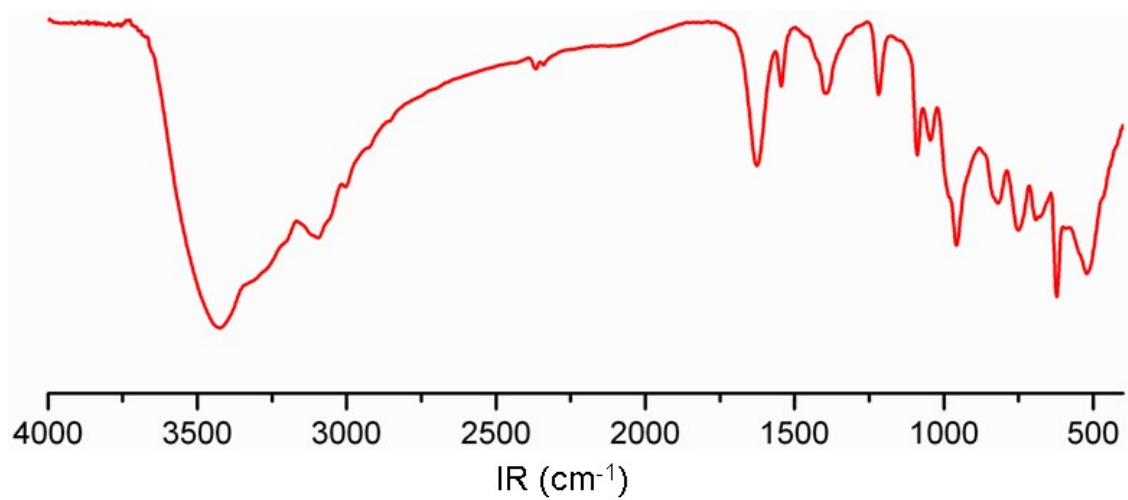

**Figure S4.** The FT-IR spectra of PMOF 2.

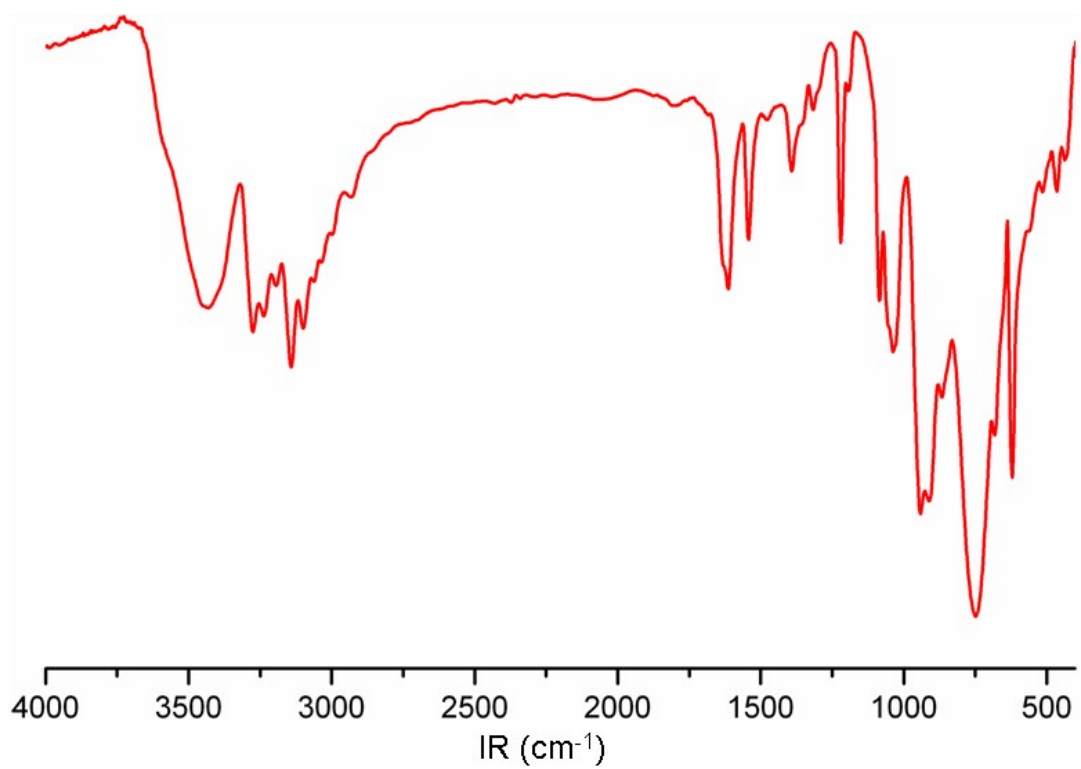

**Figure S5.** The FT-IR spectra of PMOF 3.

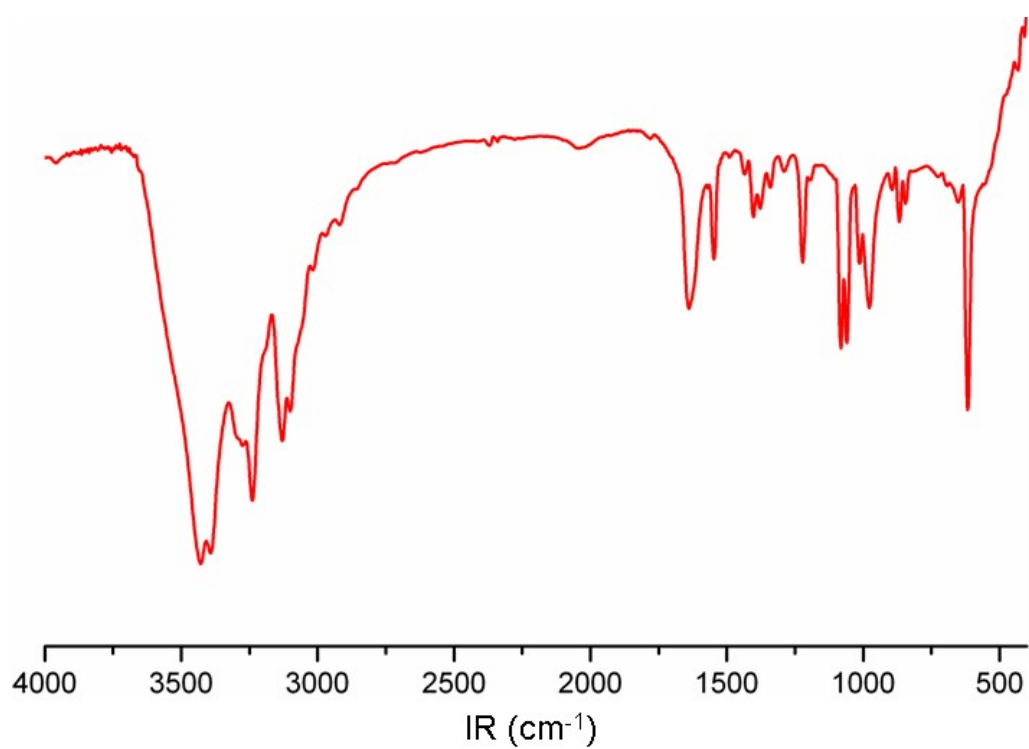

**Figure S6.** The FT-IR spectra of the reused PMOF 1.

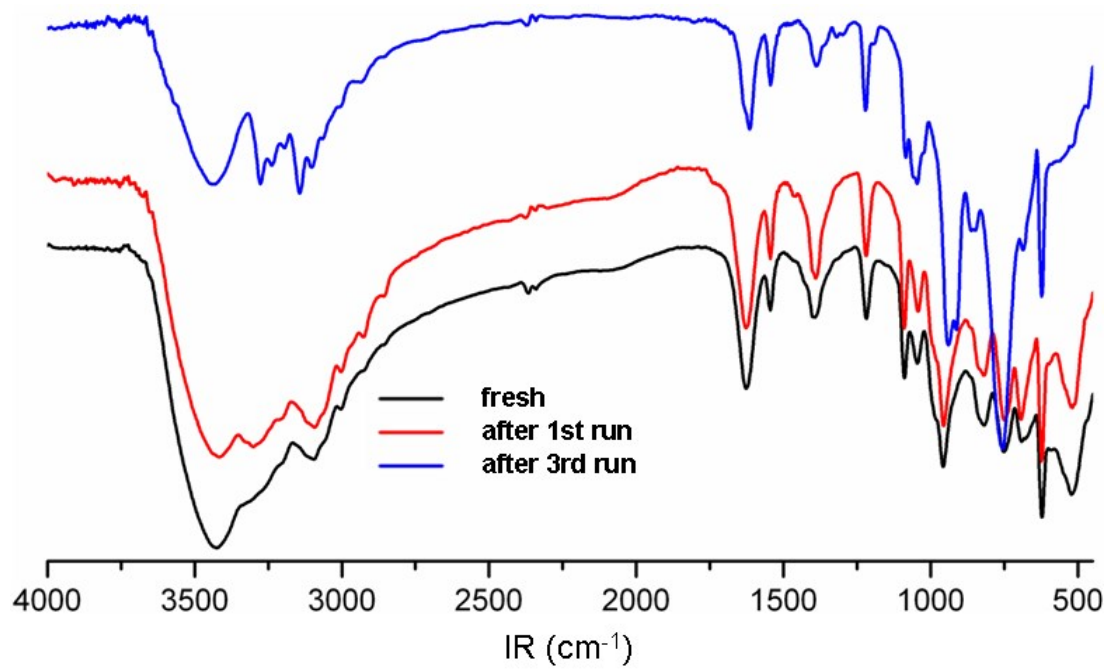

**Figure S7.** The simulated, experimental and recycled PXRD patterns of PMOF 1. Simulation based on the SXRD data.

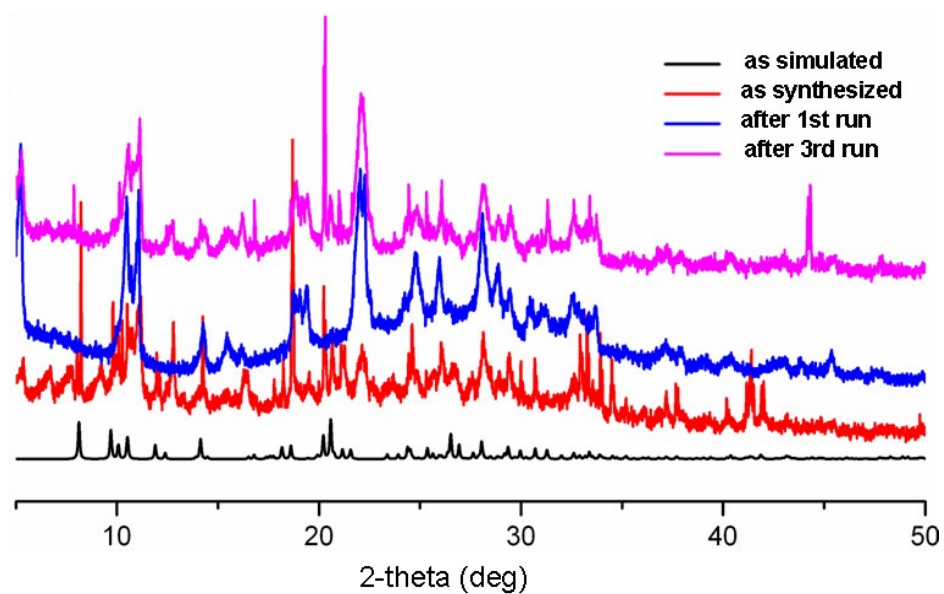

**Figure S8.** The simulated (black) and experimental (red) PXRD patterns of PMOF 2. Simulation based on the SXRD data.

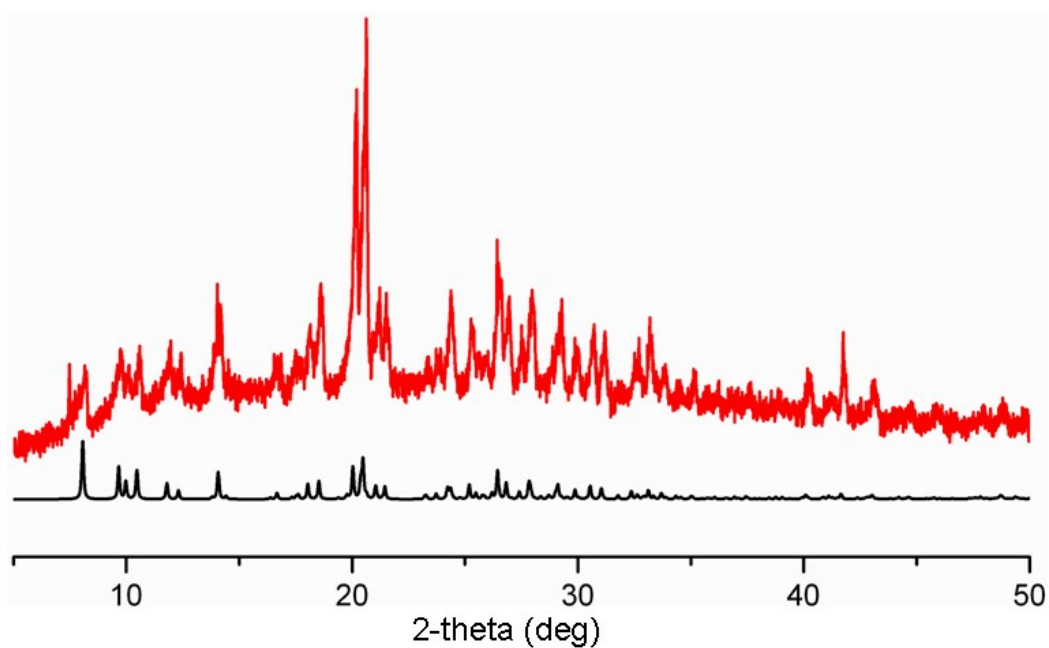

**Figure S9.**The simulated (black) and experimental (red) PXRD patterns of PMOF 3. Simulation based on the SXRD data.

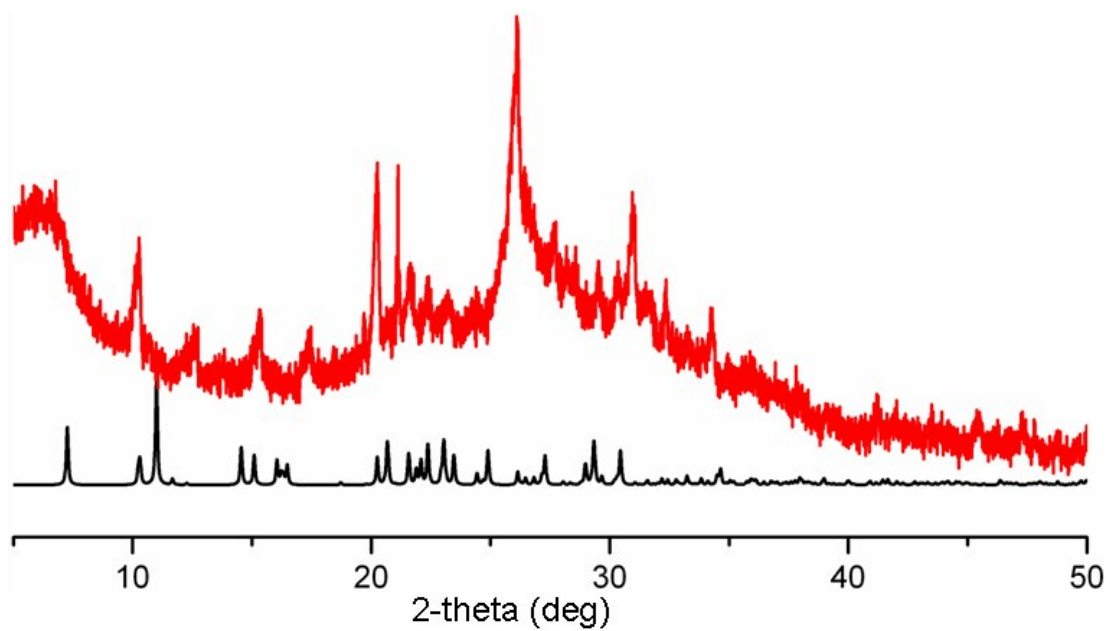

**Figure S10.** The TG analysis curves of PMOFs 1-3.

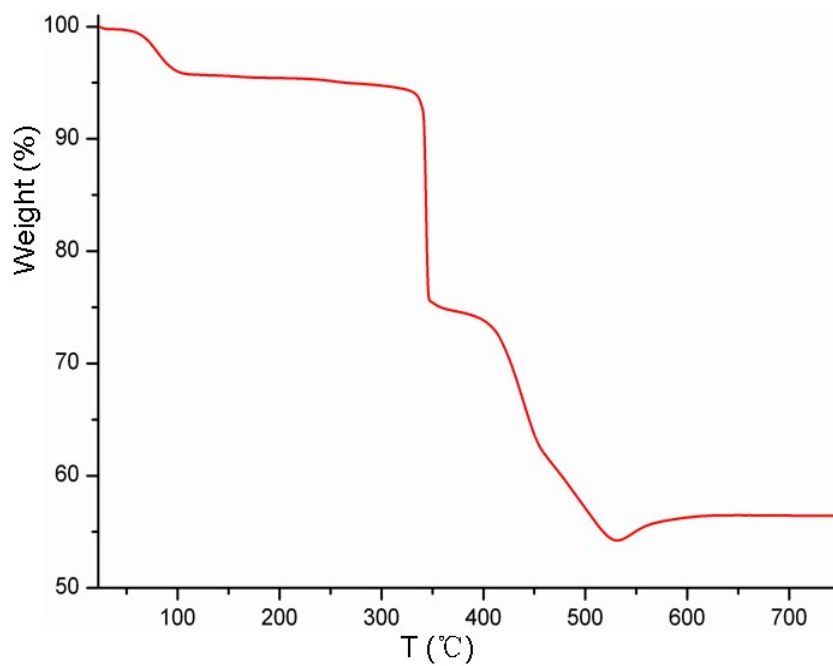

(a) The TGA curve of PMOF 1.



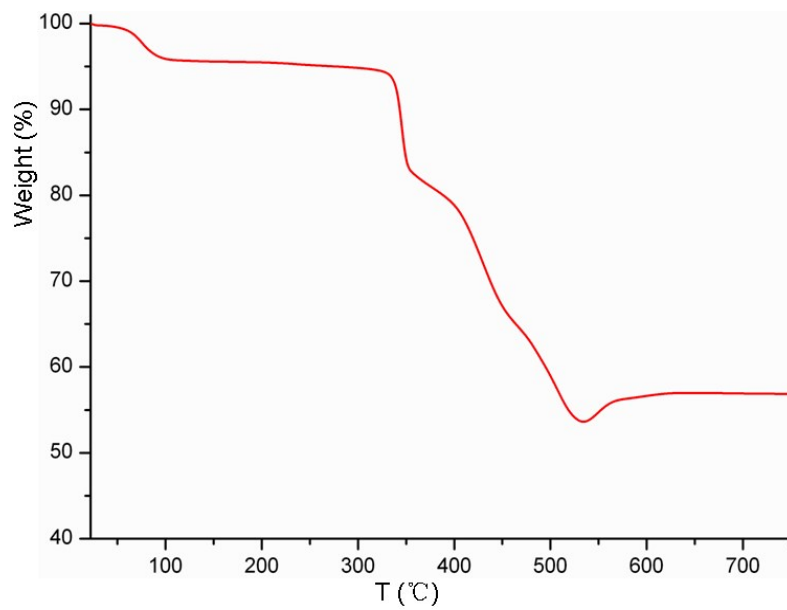

(b) The TGA curve of PMOF 2.

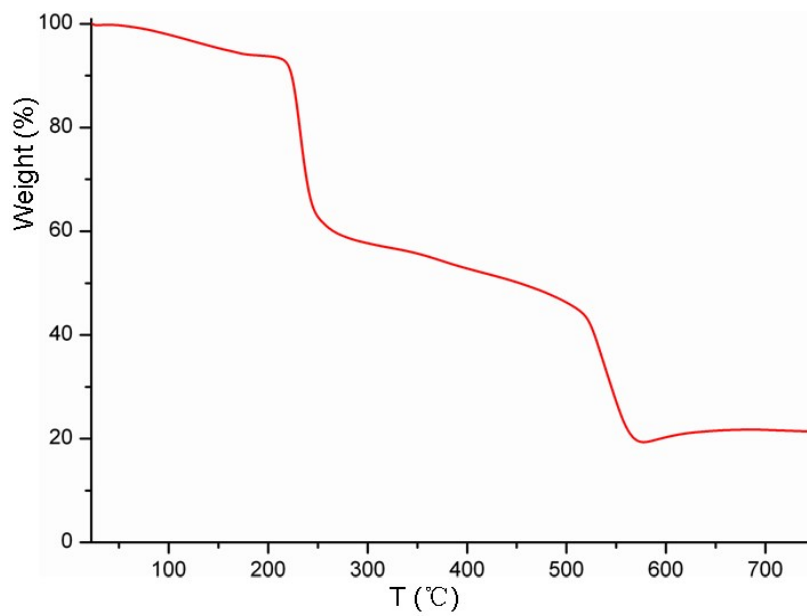

(c) The TGA curve of PMOF 3.

Figure S11. The  $^1\text{H}$  NMR and  $^{13}\text{C}$  NMR spectra of the compounds isolated from Knoevenagel condensation.

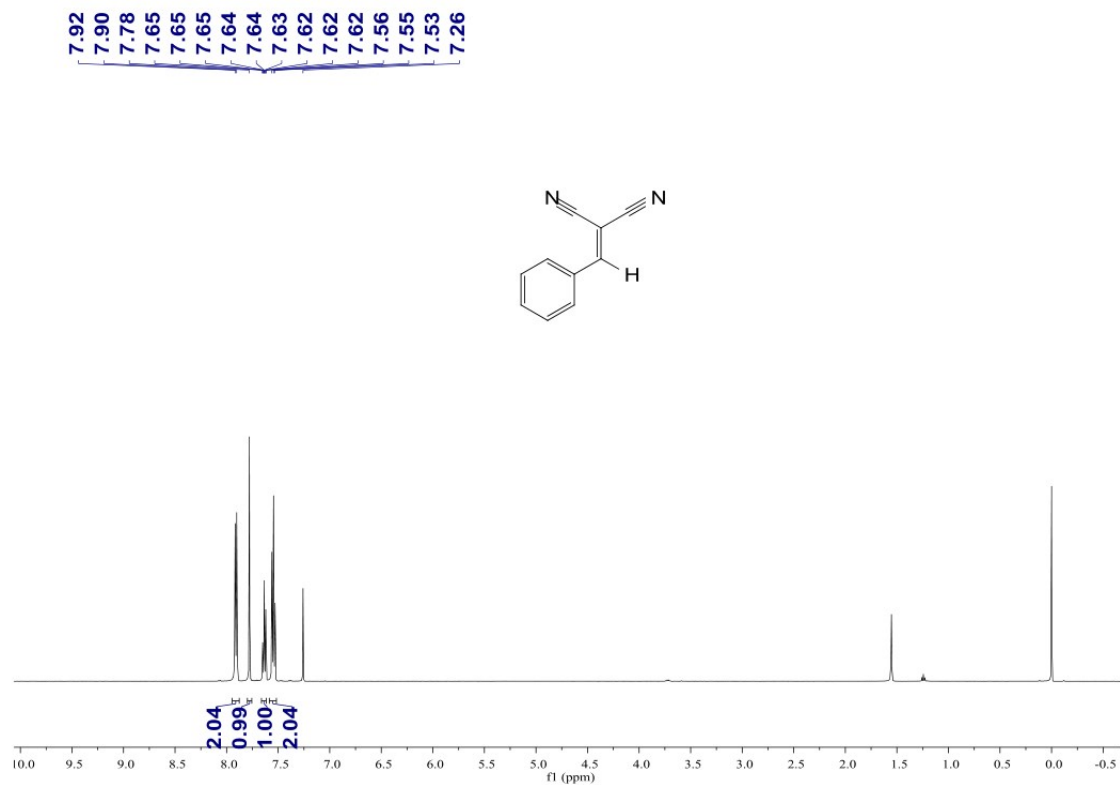

(a)  $^1\text{H}$  NMR spectrum of 2-benzylidenemalononitrile in  $\text{CDCl}_3$ .

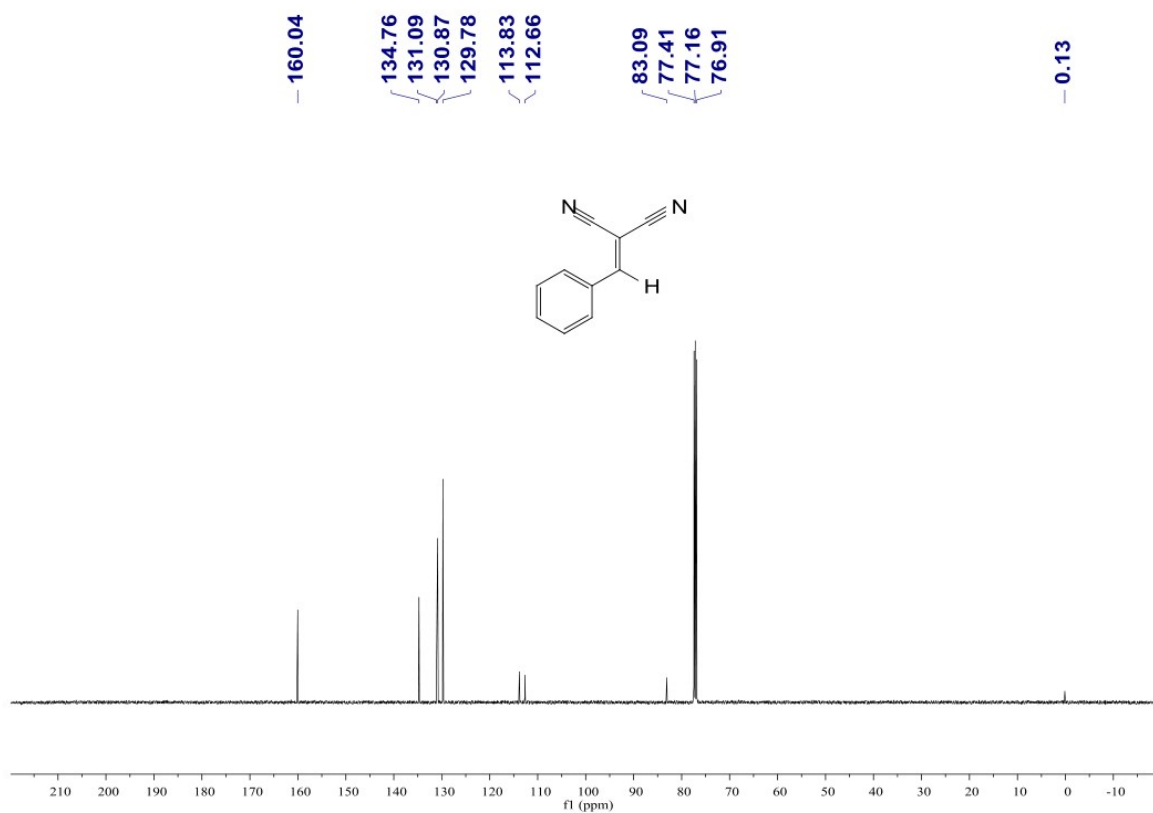

(b)  $^{13}\text{C}$  NMR spectrum of 2-benzylidenemalononitrile in  $\text{CDCl}_3$ .

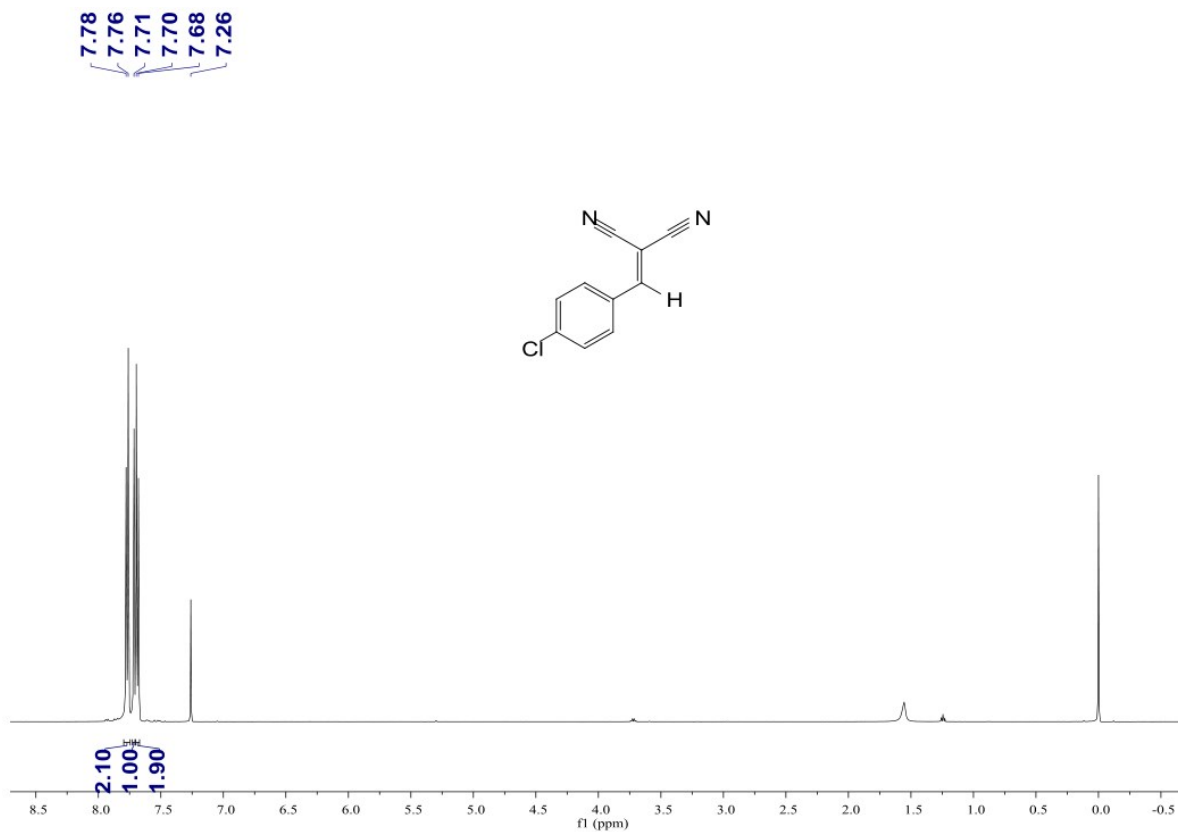

(c) <sup>1</sup>H NMR spectrum of 2-(4-chlorobenzylidene)malononitrile in CDCl<sub>3</sub>.

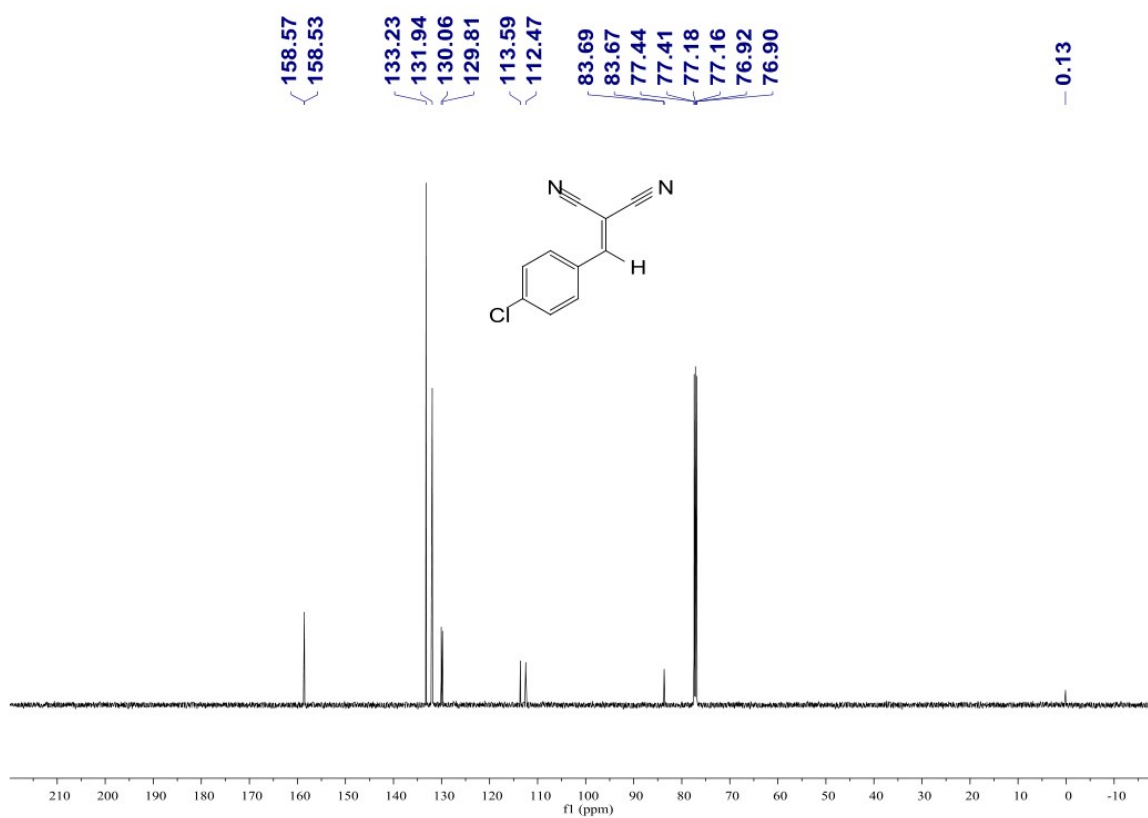

(d) <sup>13</sup>C NMR spectrum of 2-(4-chlorobenzylidene)malononitrile in CDCl<sub>3</sub>.

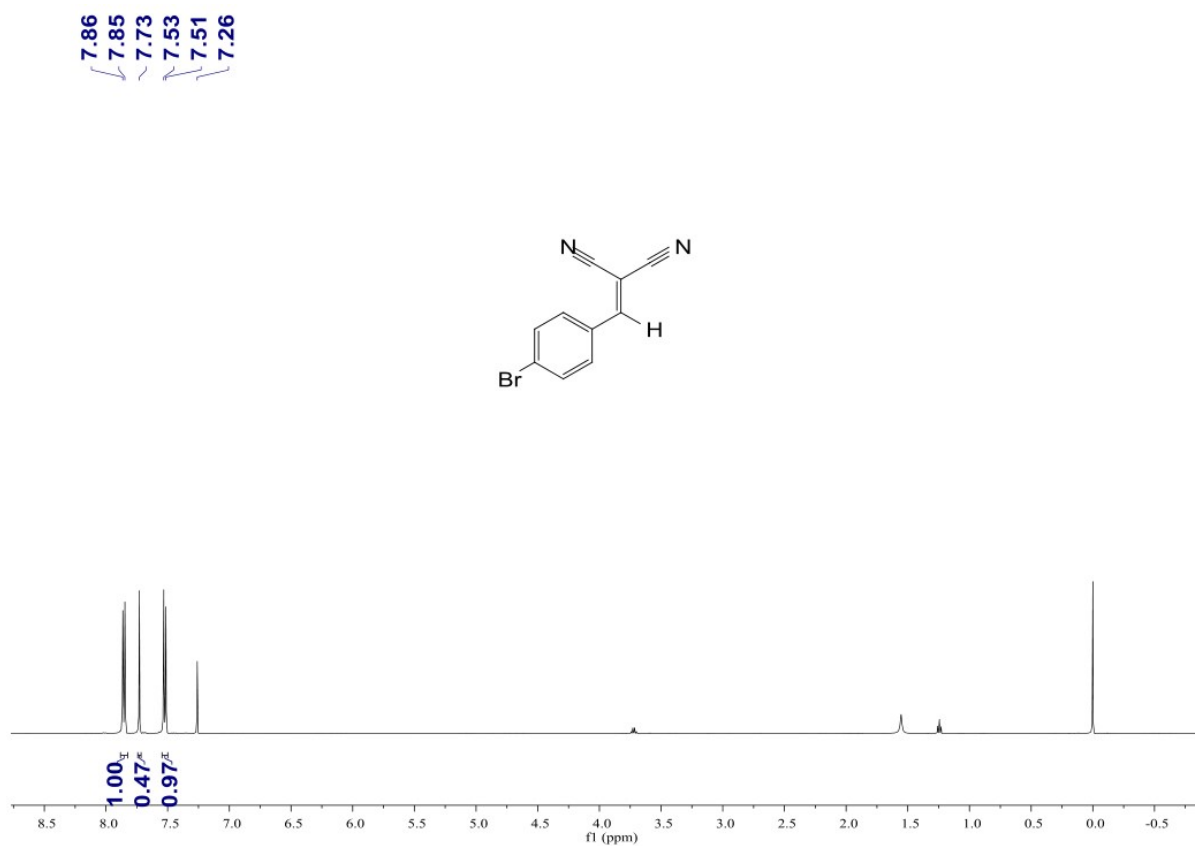

(e) <sup>1</sup>H NMR spectrum of 2-(4-bromobenzylidene)malononitrile in CDCl<sub>3</sub>.

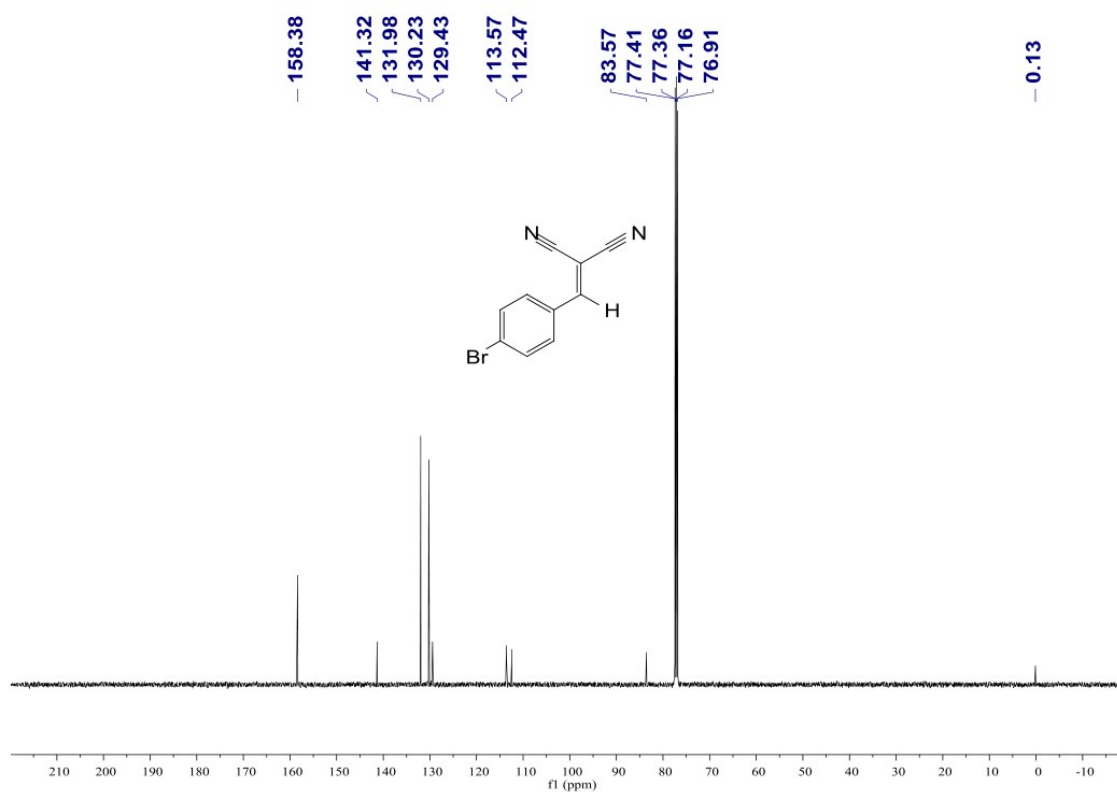

(f) <sup>13</sup>C NMR spectrum of 2-(4-bromobenzylidene)malononitrile in CDCl<sub>3</sub>.

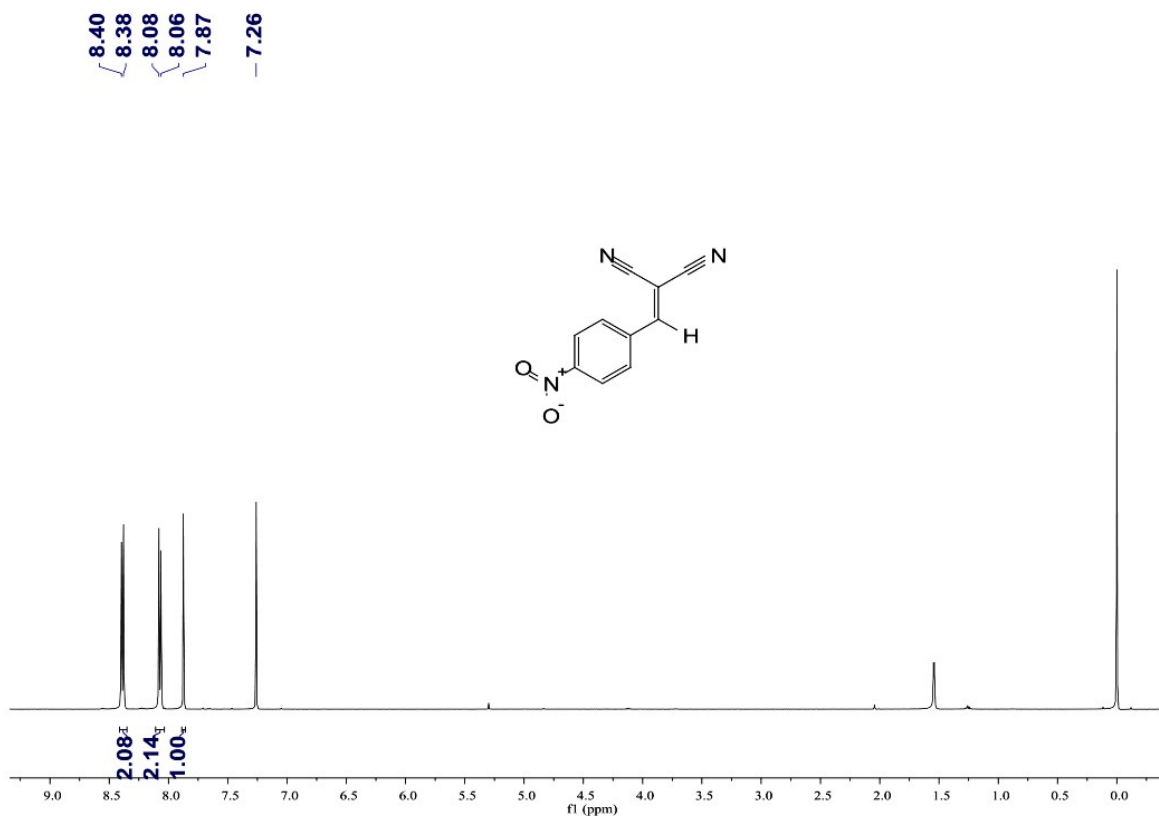

(g) <sup>1</sup>H NMR spectrum of 2-(4-nitrobenzylidene)malononitrile in CDCl<sub>3</sub>.

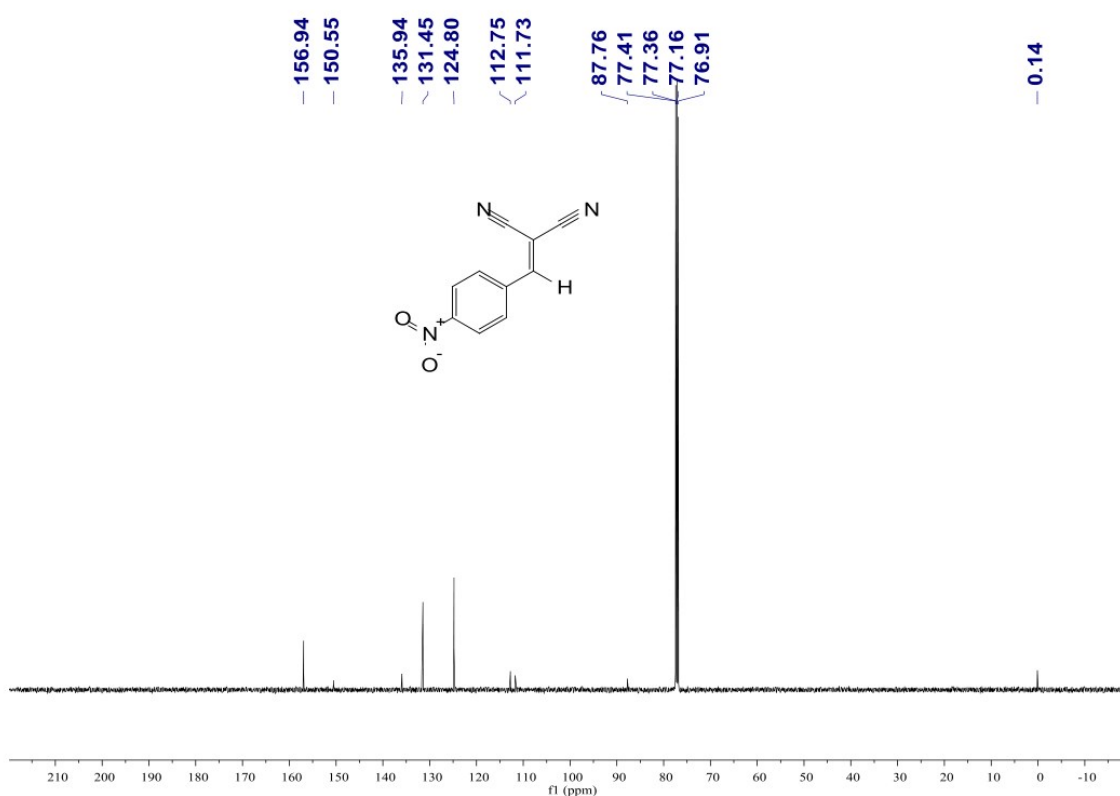

(h) <sup>13</sup>C NMR spectrum of 2-(4-nitrobenzylidene)malononitrile in CDCl<sub>3</sub>.

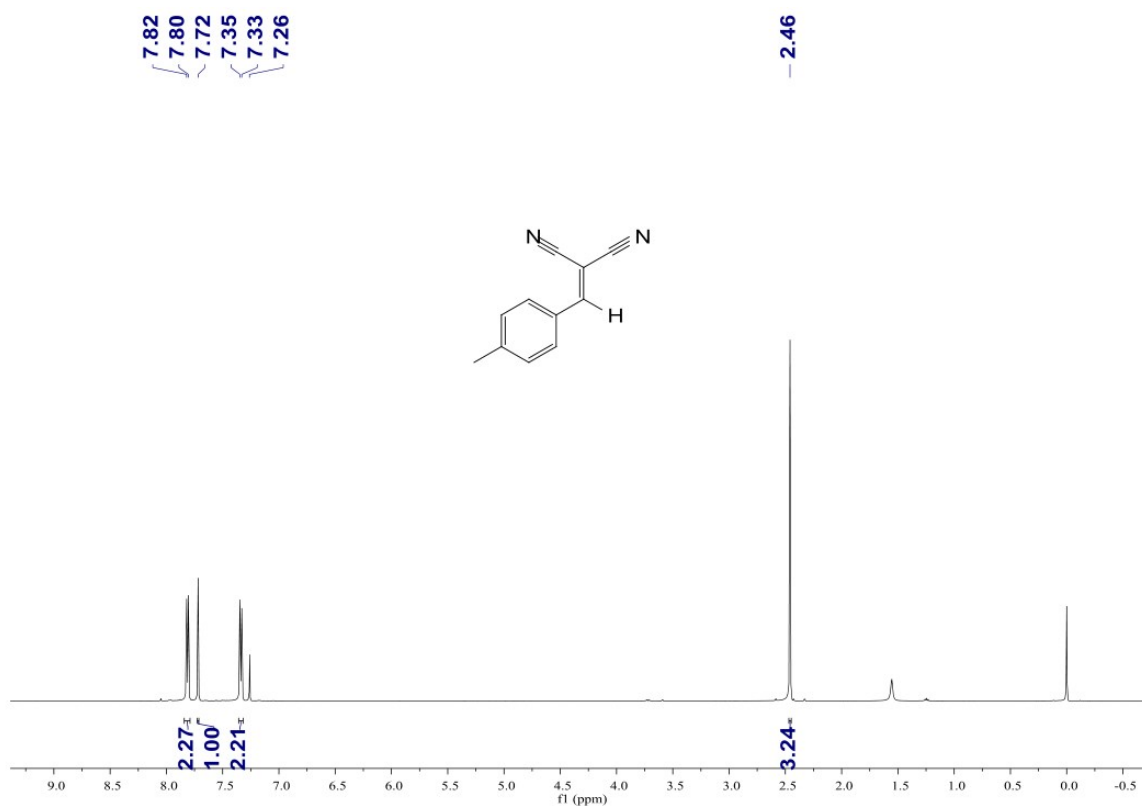

(i) <sup>1</sup>H NMR spectrum of 2-(4-methylbenzylidene)malononitrile in CDCl<sub>3</sub>.

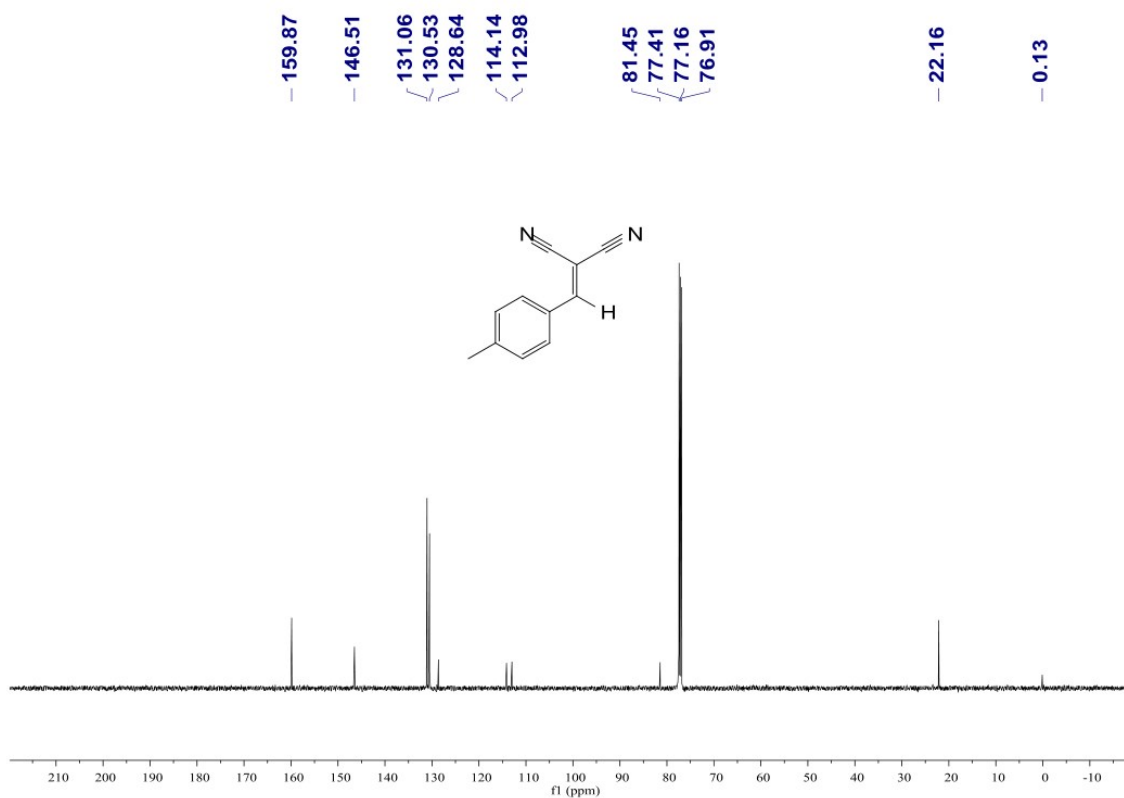

(j) <sup>13</sup>C NMR spectrum of 2-(4-methylbenzylidene)malononitrile in CDCl<sub>3</sub>.

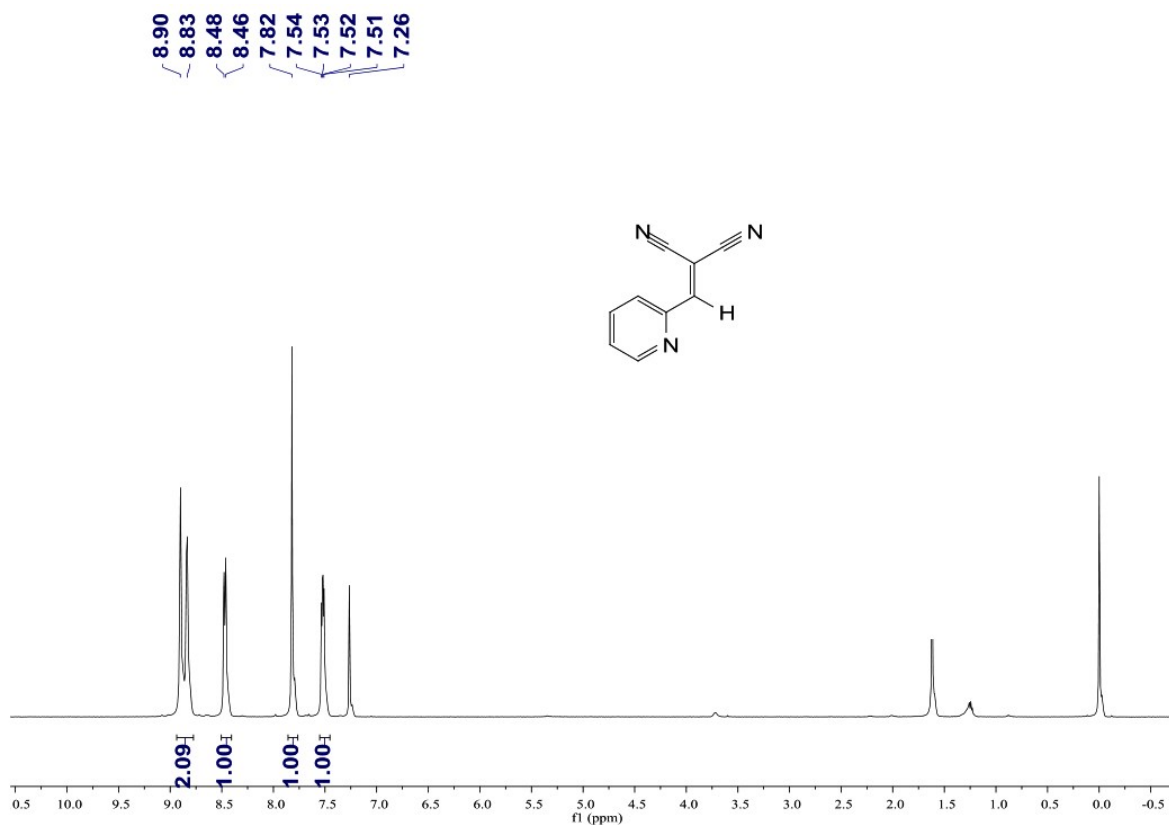

(k) <sup>1</sup>H NMR spectrum of 2-(2-pyridinylidene)malononitrile in CDCl<sub>3</sub>.

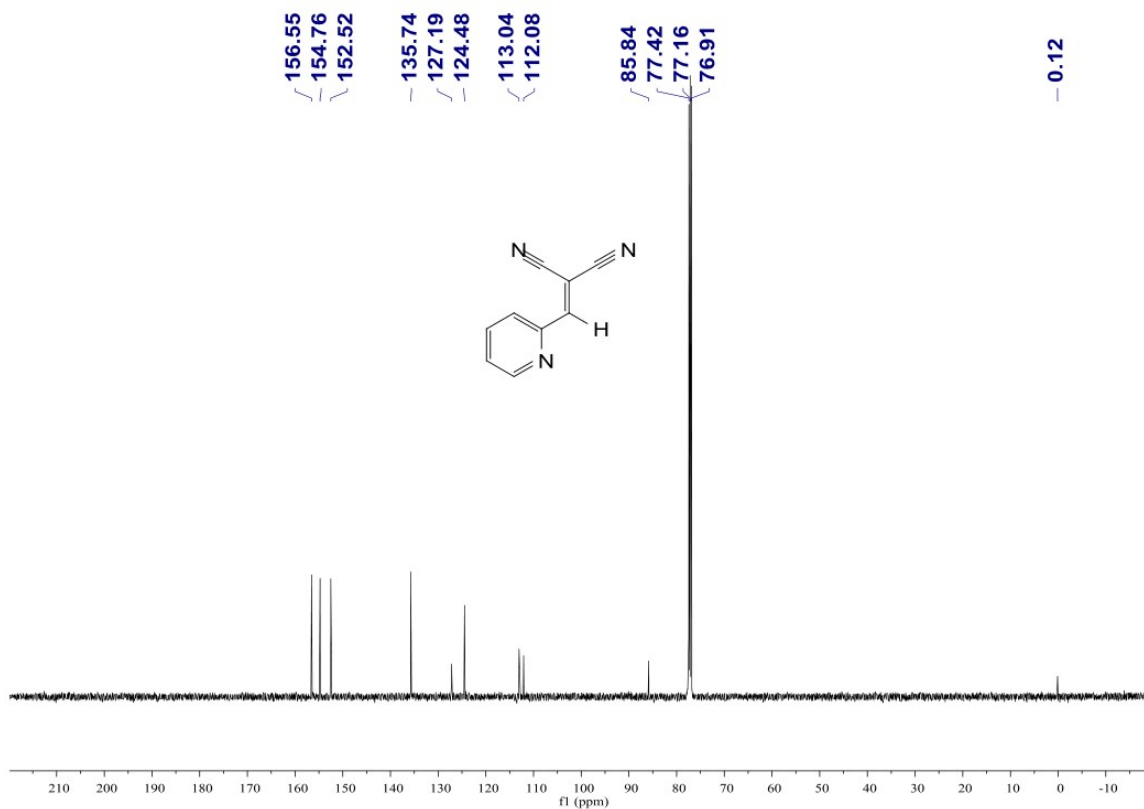

(l) <sup>13</sup>C NMR spectrum of 2-(2-pyridinylidene)malononitrile in CDCl<sub>3</sub>.

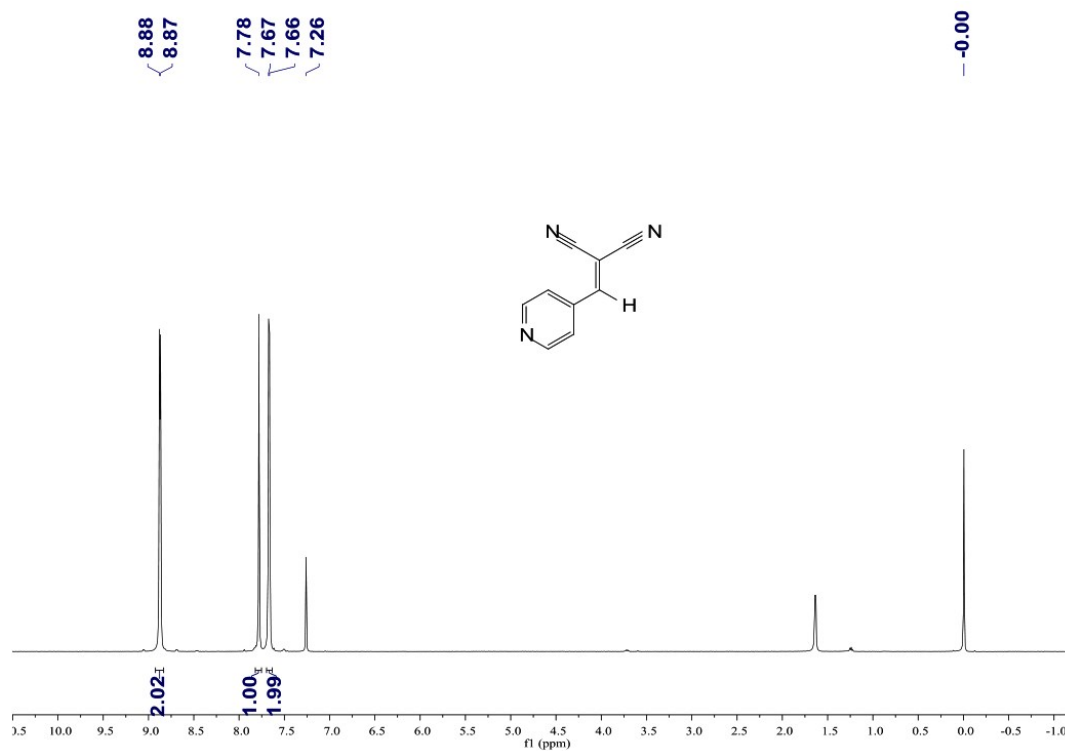

(m)  $^1\text{H}$  NMR spectrum of 2-(4-pyridinylidene)malononitrile in  $\text{CDCl}_3$ .

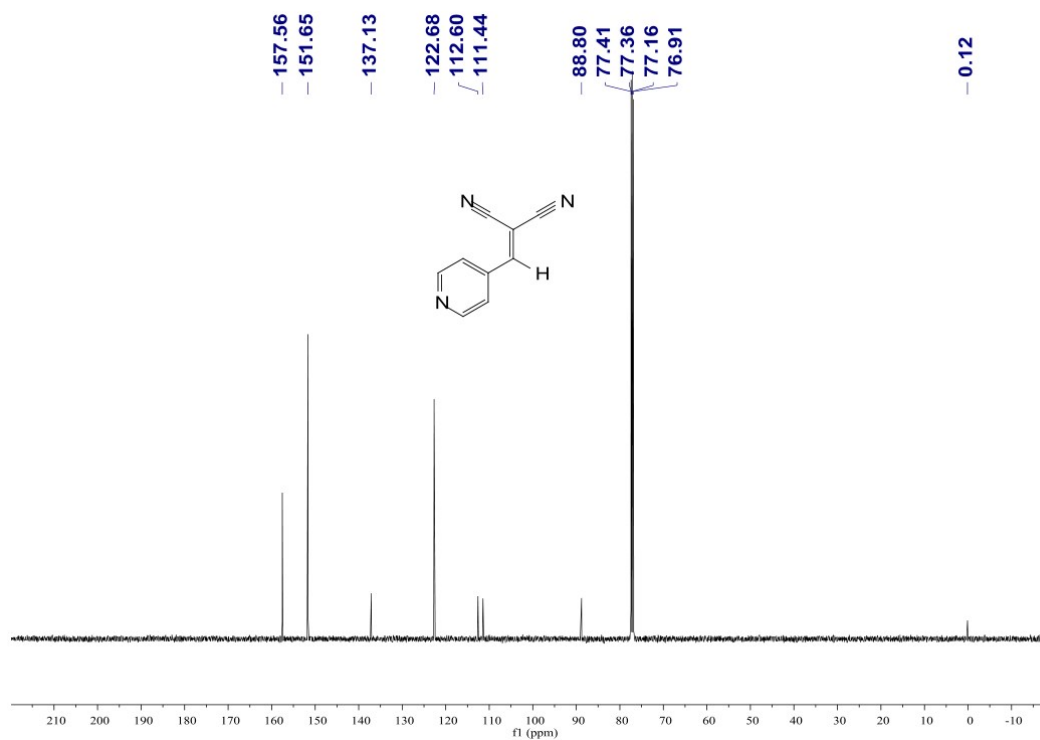

(n)  $^{13}\text{C}$  NMR spectrum of 2-(4-pyridinylidene)malononitrile in  $\text{CDCl}_3$ .

**Reference:**

- [1] N. E. Brese and M. O'Keeffe, *Acta Cryst. Sect. B*, 1991, **47**, 192.
- [2] I. D. Brown and D. Altermatt, *Acta Cryst.* **1985**, *B41*, 244.
- [3] H. H. Thorp, *Inorg. Chem.* **1992**, *31*, 1585.
